# Supplementary material for: Diagnostic Testing for Sepsis: A Systematic Review of Economic Evaluations
Source: MDPI journal article supplement (doi:10.3390/antibiotics11010027), 2021-12-27
Supplement: s1 [file s1]

**Supplementary File 1 Syntax used in the search to retrieve economic evaluation of diagnostic strategies for the management of sepsis.**

**SCOPUS**

(TITLE-ABS-KEY(pharmacoeconomic \*)  
OR TITLE-ABS-KEY(cost-effectiveness)  
OR TITLE-ABS-KEY("economic evaluation")  
OR TITLE-ABS-KEY("health technology assessment"))  
AND (TITLE-ABS-KEY(antibiotic\*)  
OR TITLE-ABS-KEY(infectious)  
OR TITLE-ABS-KEY("bacterial infection")  
OR TITLE-ABS-KEY("viral infection"))  
AND (TITLE-ABS-KEY("diagnostic")  
OR TITLE-ABS-KEY("diagnostics")  
OR TITLE-ABS-KEY("test")  
OR TITLE-ABS-KEY("tests")  
OR TITLE-ABS-KEY("testing"))  
AND (TITLE-ABS-KEY("sepsis"))  
AND PUBYEAR >1999  
AND PUBYEAR <2020

**PUBMED**

((infectious  
OR "bacterial infection"  
OR "viral infection"  
OR antibiotic \*  
OR antimicrobial)  
AND ("diagnostic"  
OR "diagnostics"  
OR "test"  
OR "tests"  
OR "testing")  
AND (pharmacoeconomic \*  
OR "cost-effectiveness"  
OR "economic evaluation"  
OR "health technology assessment")  
AND ("sepsis")  
) AND (("2000/01/01"[Date - Publication] : "2020/12/31"[Date - Publication]))

**WEB OF SCIENCE**

TS = (((("bacterial infection"  
OR "viral infection"  
OR antibiotic \*  
OR antimicrobial  
OR infectious)  
AND ("diagnostics"  
OR "diagnostic"  
OR "test"  
OR "tests"  
OR "testing")  
AND (pharmacoeconomic\*  
OR cost-effectiveness

OR “economic evaluation”  
OR “health technology assessment”)  
AND (“sepsis”)))  
Period of time: 2000–2020

**Supplementary File S2 CHEERS Checklist Results**

| <b>CHEERS Item</b>                                                   | <b>Percentage of Articles that Reported the Item (n = 16)</b> |
|----------------------------------------------------------------------|---------------------------------------------------------------|
| Title                                                                | 100%                                                          |
| Abstract                                                             | 100%                                                          |
| Background and objective                                             | 100%                                                          |
| Target population                                                    | 100%                                                          |
| Setting                                                              | 100%                                                          |
| Study perspective                                                    | 100%                                                          |
| Interventions compared                                               | 100%                                                          |
| Treatment                                                            | 100%                                                          |
| Time horizon                                                         | 93.7%                                                         |
| Discount rate for health outcomes                                    | 6.3%                                                          |
| Discount rate for economic outcomes                                  | 0%                                                            |
| Reported clinical outcomes                                           | 100%                                                          |
| Measurement of effectiveness                                         | 100%                                                          |
| Resource and cost estimations                                        | 100%                                                          |
| Currency year used                                                   | 100%                                                          |
| Type of model                                                        | 100%                                                          |
| Assumptions                                                          | 100%                                                          |
| Analytical methods                                                   | 100%                                                          |
| Study parameters                                                     | 100%                                                          |
| Characterizing uncertainty                                           | 93.7%                                                         |
| Study findings, limitations, generalizability, and current knowledge | 100%                                                          |
| Source of funding                                                    | 87.5%                                                         |
| Conflicts of interest                                                | 75%                                                           |
